# Supplementary material
Source: PubMed Central journal article supplement (PMC10348701)

### A Overview of samples

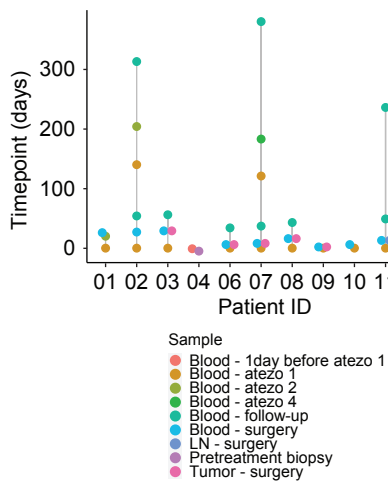

### B Gated main population frequencies

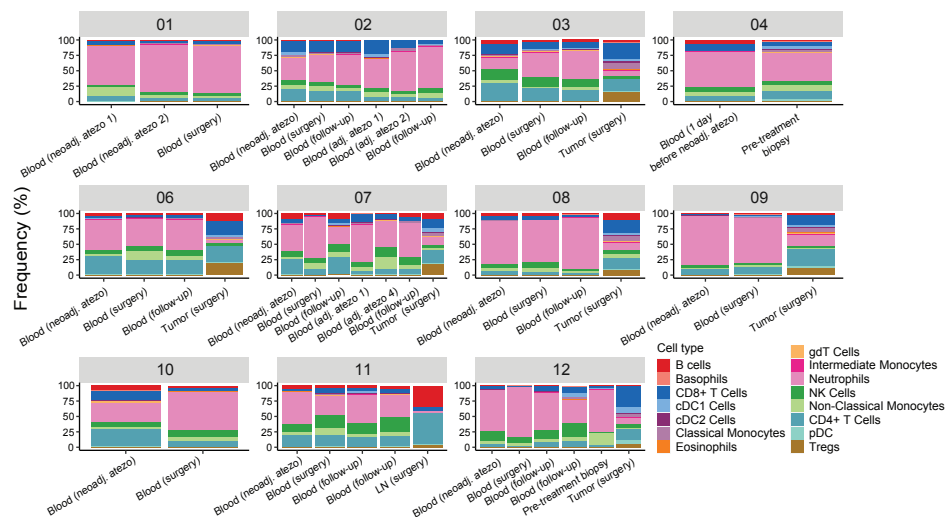

### C PCA (main populations)

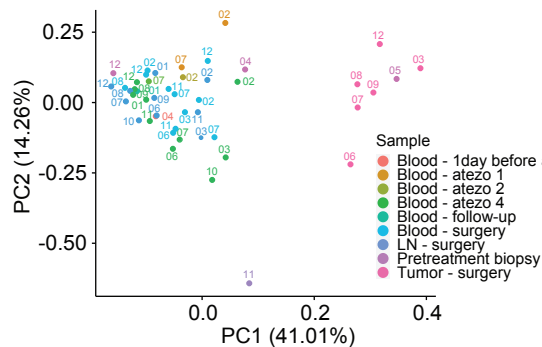

### D UMAP with naive CD8

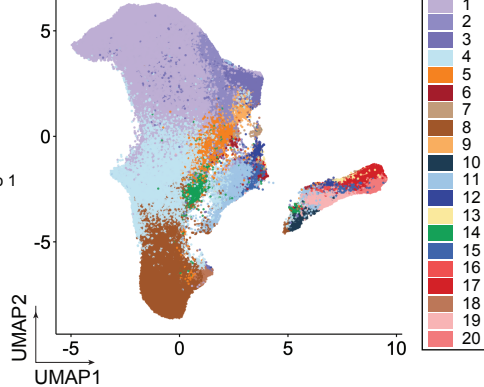

### E Blood

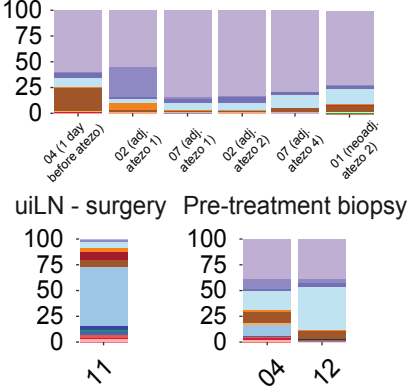

### F

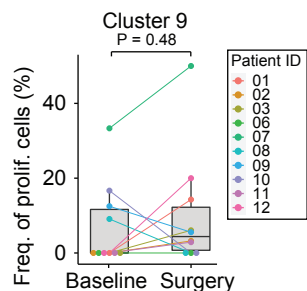

### G Surgery: Tumor vs. Blood

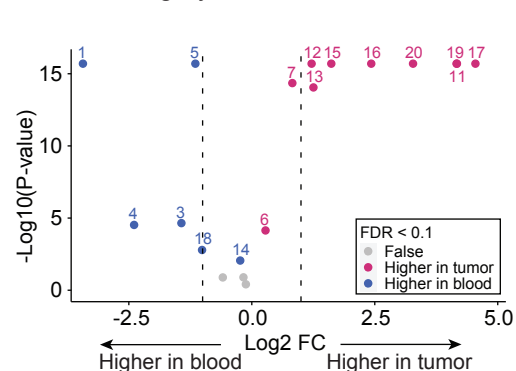

### H Surgery: Tumor vs. Blood

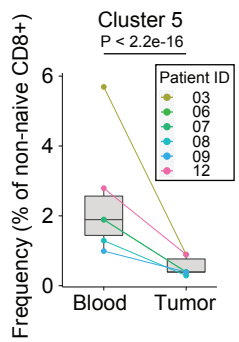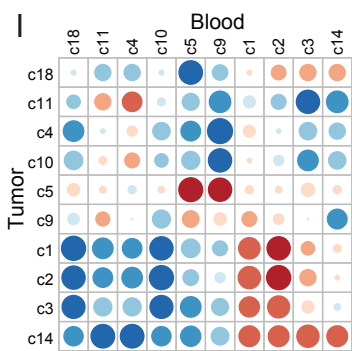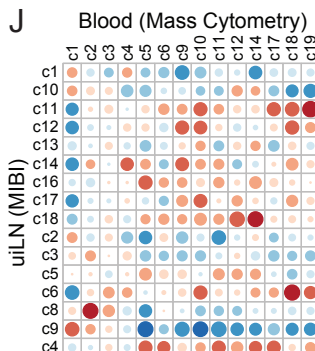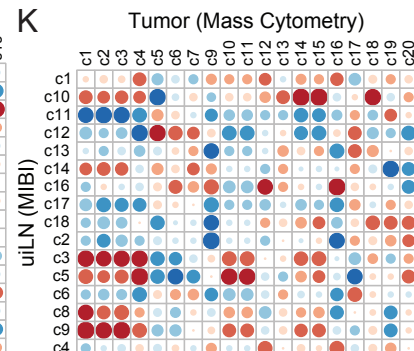

Supplement: NIHMS1882713-supplement-5.pdf [file NIHMS1882713-supplement-5.pdf]
