# Supplementary material
Source: PubMed Central journal article supplement (PMC10348701)

# A General Gating Strategy

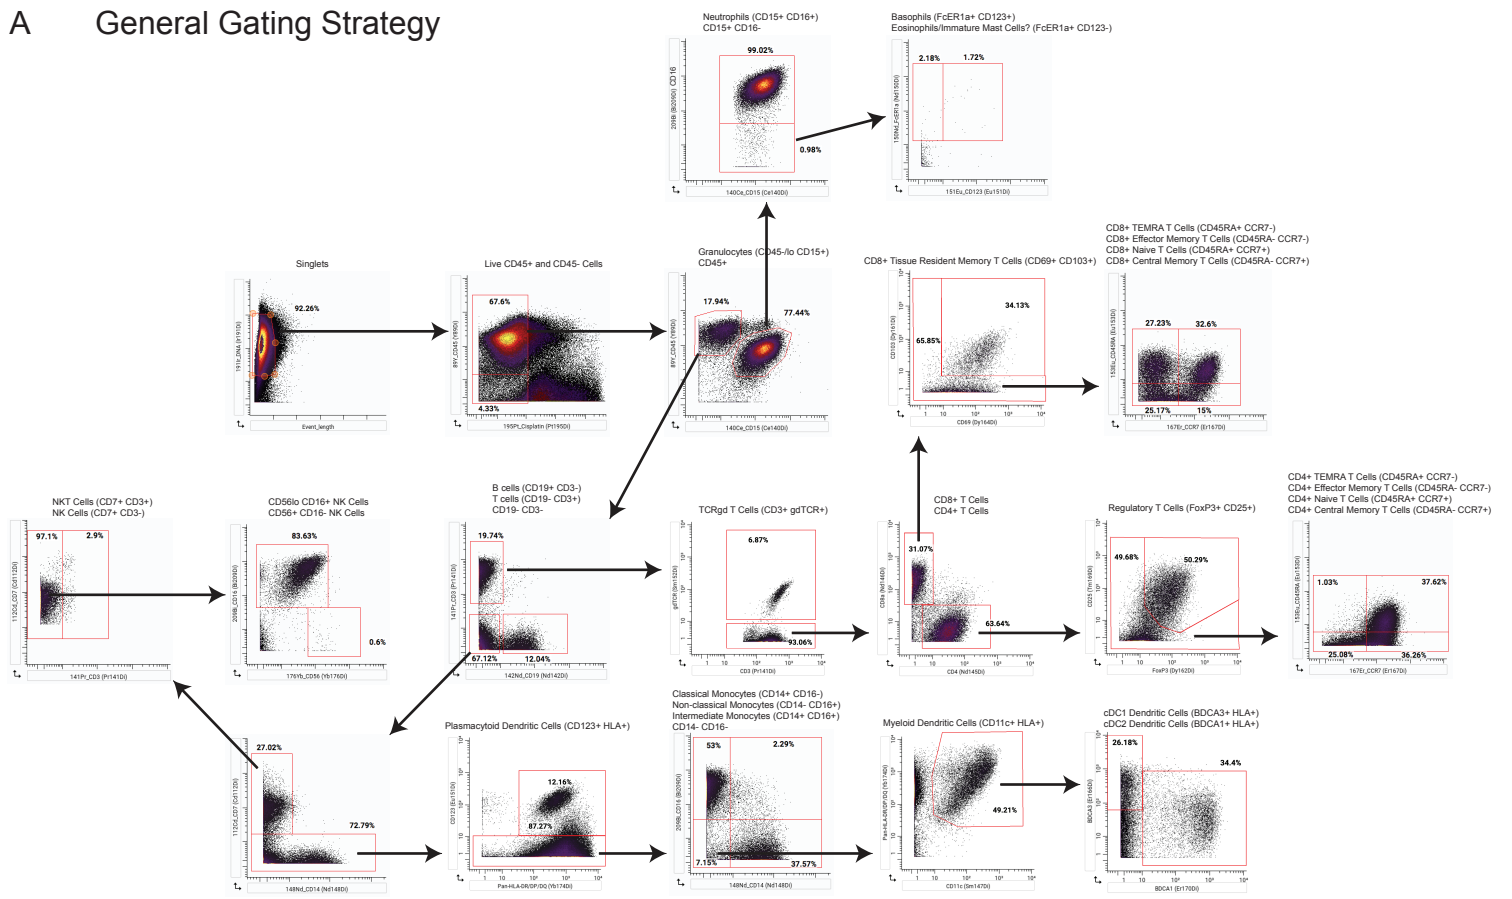

## B

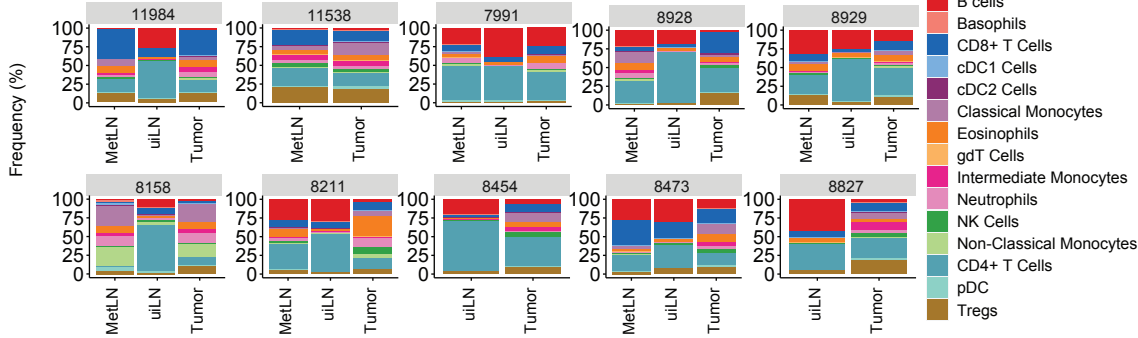

## C UMAP including Naive CD8+ T cells

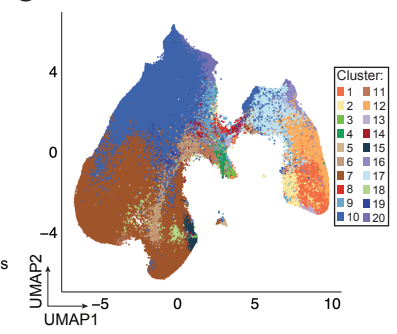

## D

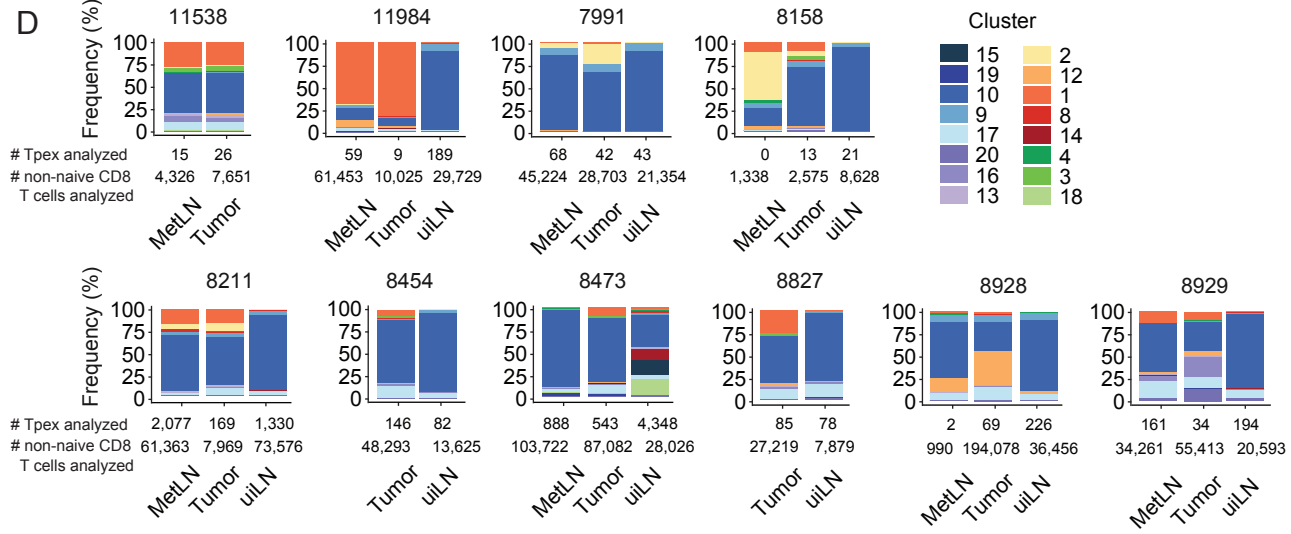

Supplement: NIHMS1882713-supplement-1.pdf [file NIHMS1882713-supplement-1.pdf]

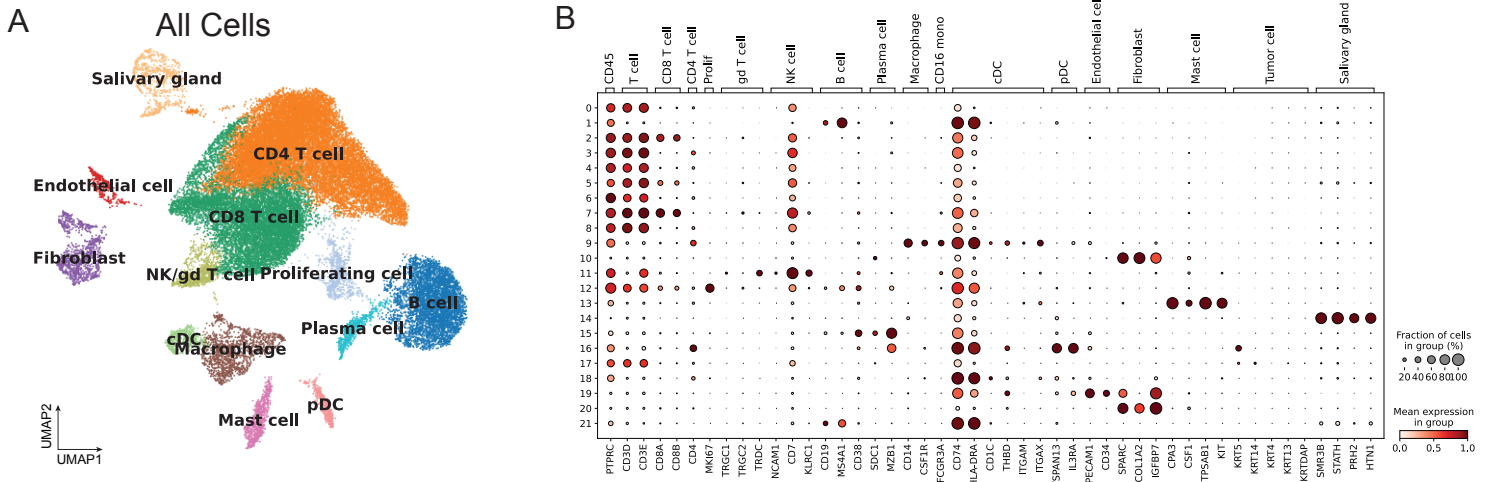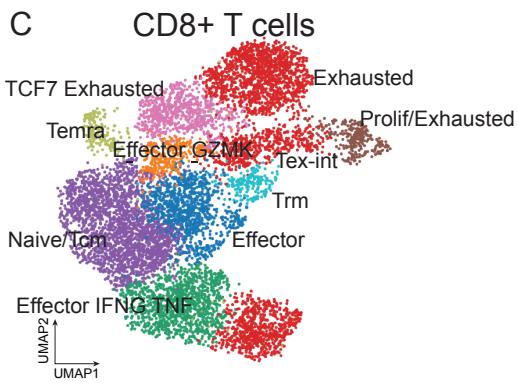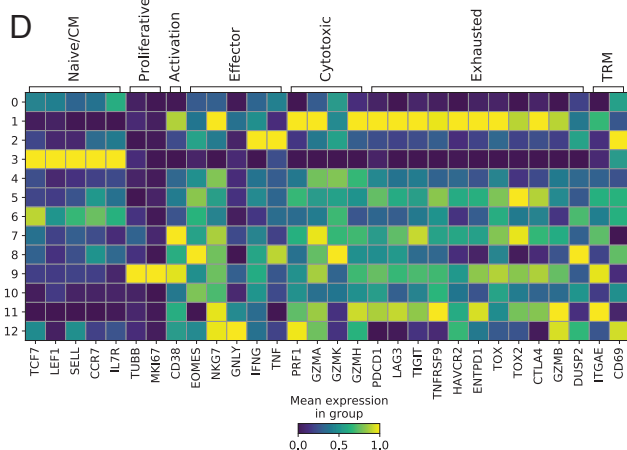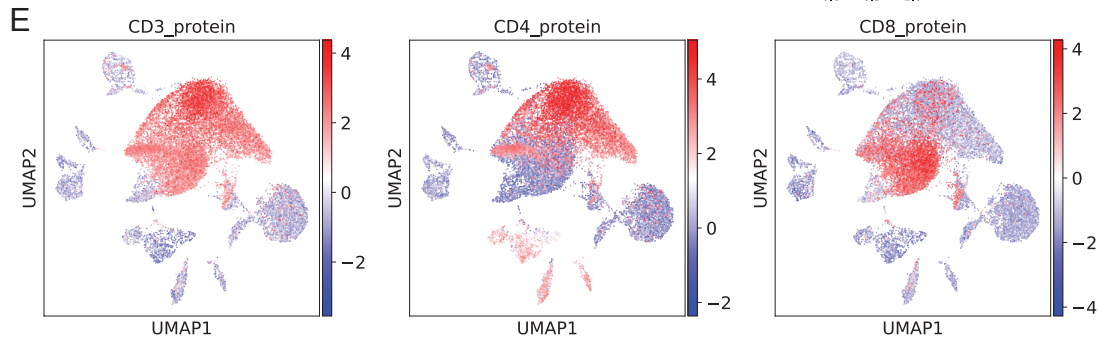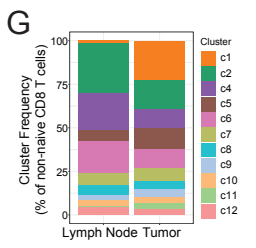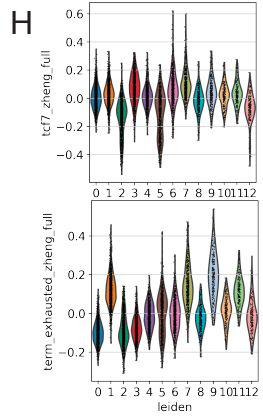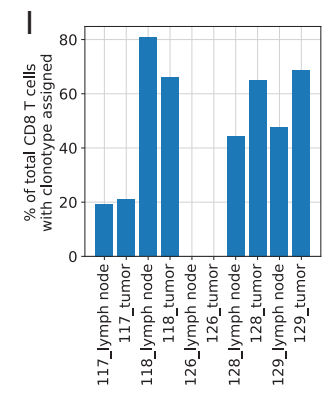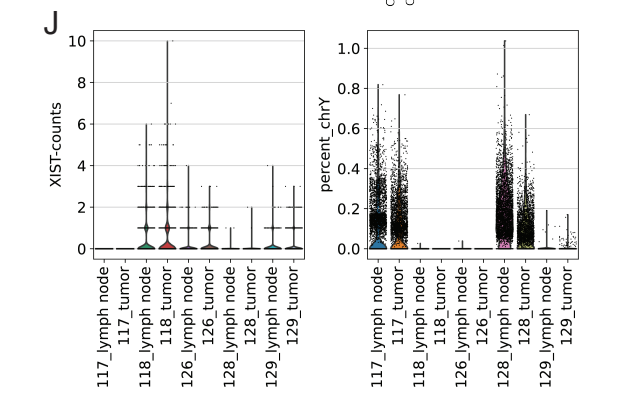

Supplement: NIHMS1882713-supplement-2.pdf [file NIHMS1882713-supplement-2.pdf]

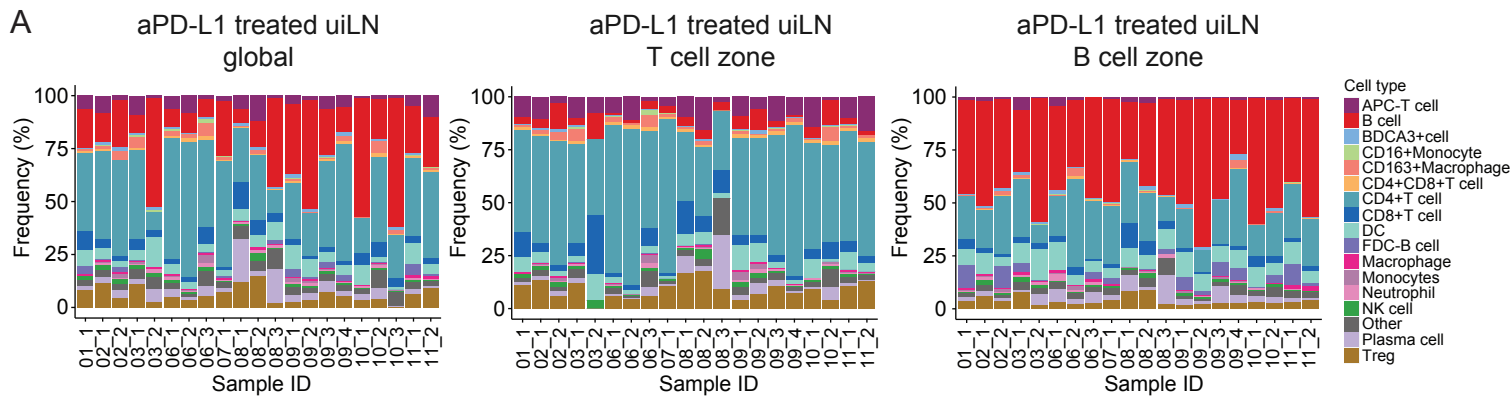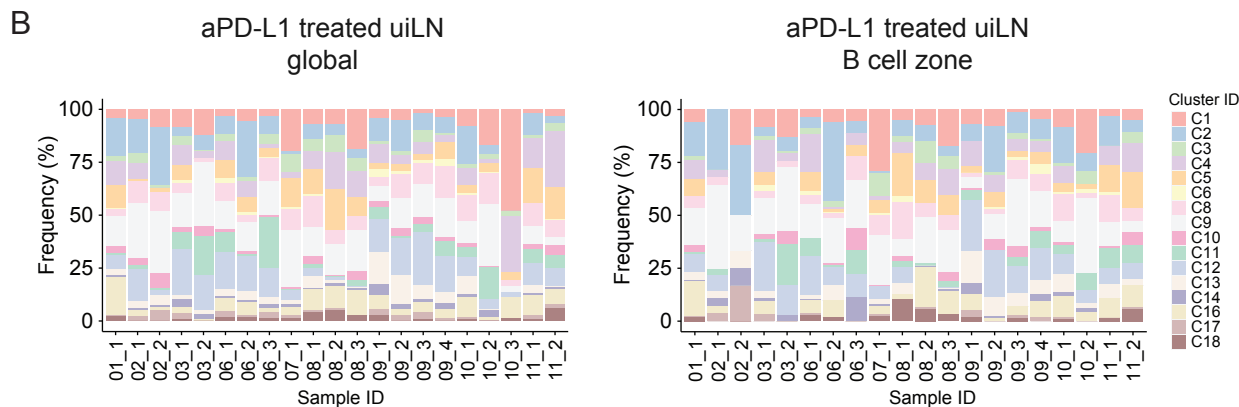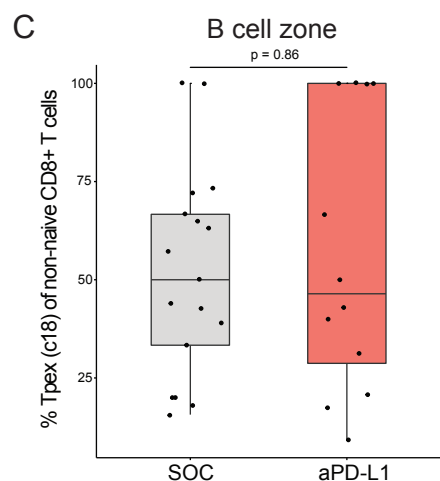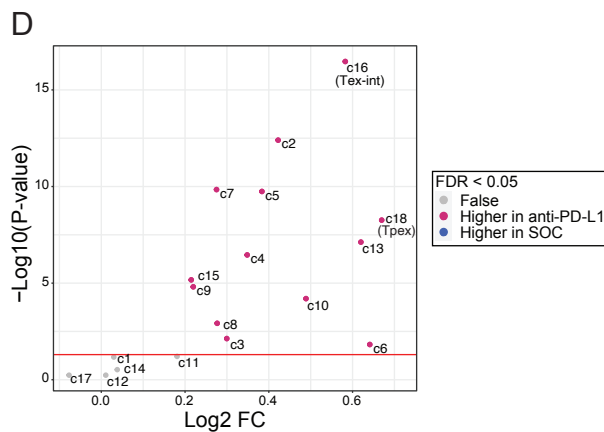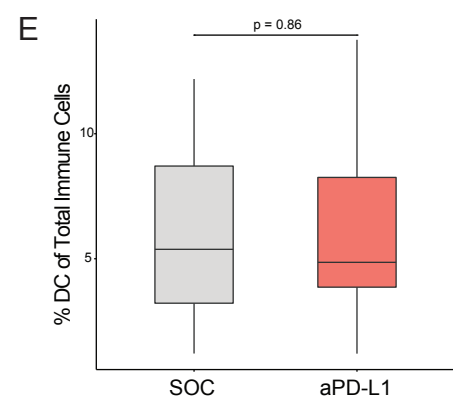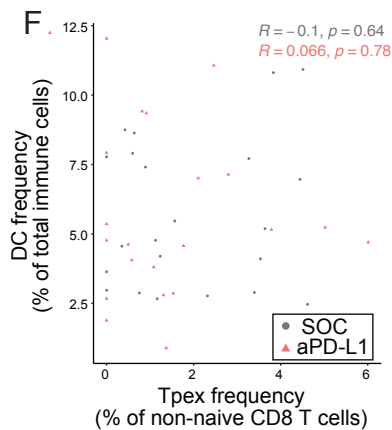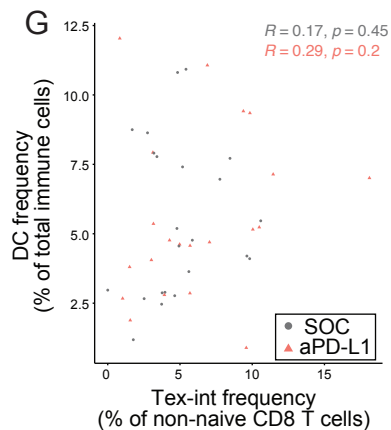

Supplement: NIHMS1882713-supplement-4.pdf [file NIHMS1882713-supplement-4.pdf]
